# Supplementary material for: Functionally overlapping intra- and extralysosomal pathways promote bis(monoacylglycero)phosphate synthesis in mammalian cells
Source: PubMed Central journal article supplement — Nat Commun. 2024 Nov 16;15:9937. doi: 10.1038/s41467-024-54213-1 (PMC11568333; doi:10.1038/s41467-024-54213-1), 2024-11-16
Supplement: 41467_2024_54213_MOESM1_ESM.pdf [file 41467_2024_54213_MOESM1_ESM.pdf]

## Supplementary Information for:

### Functionally overlapping pathways promote bis(monoacylglycero)phosphate synthesis in mammalian cells

Dominik Bulfon<sup>1#</sup>, Johannes Breithofer<sup>1#</sup>, Gernot F. Grabner<sup>2</sup>, Nermeen Fawzy<sup>1</sup>, Anita Pirchheim<sup>2</sup>, Heimo Wolinski<sup>1,3</sup>, Dagmar Kolb<sup>2,4</sup>, Lennart Hartig<sup>1</sup>, Martin Tischitz<sup>1</sup>, Clara Zitta<sup>1</sup>, Greta Bramerdorfer<sup>1</sup>, Achim Lass<sup>1,3</sup>, Ulrike Taschler<sup>1</sup>, Dagmar Kratky<sup>2,5</sup>, Peter Greimel<sup>6</sup>, and Robert Zimmermann<sup>1,3,5\*</sup>.

#### Authors List

<sup>1</sup>Institute of Molecular Biosciences, University of Graz, Graz, Austria

<sup>2</sup>Gottfried Schatz Research Center, Molecular Biology and Biochemistry, Medical University of Graz, Graz, Austria

<sup>3</sup>Field of Excellence BioHealth, University of Graz, Graz, Austria

<sup>4</sup>Core Facility Ultrastructure Analysis Center for Medical Research, Medical University of Graz, Graz, Austria

<sup>5</sup>BioTechMed-Graz, Graz, Austria

<sup>6</sup>Laboratory for Cell Function Dynamics, Center for Brain Science, RIKEN, Wako, Saitama 351-0198, Japan

#Authors contributed equally

#### Contains:

**Figure S1-5**

**Table S1-3**

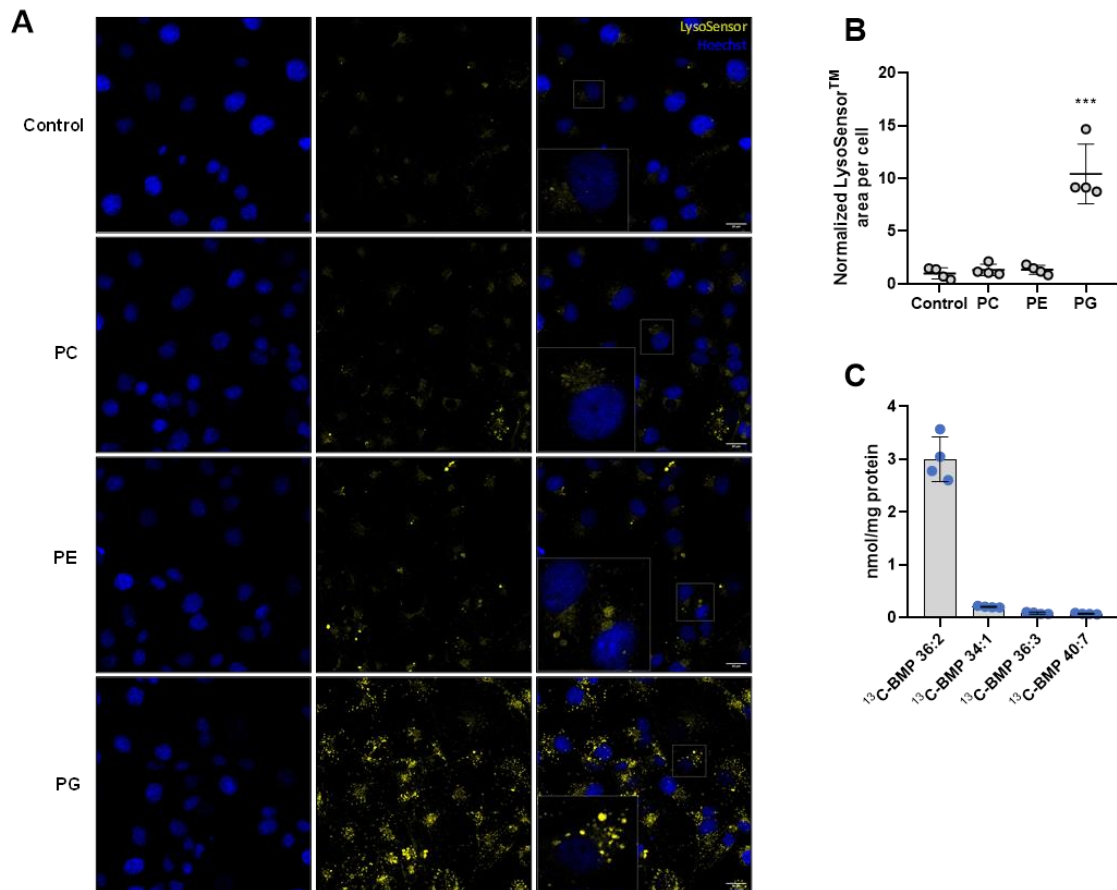

**Figure S1.** (A) Live cell imaging of COS-7 cells supplemented with indicated phospholipids for 18 h (50  $\mu$ M, all esterified with oleic acid). LE/Lysosomes were stained with LysoSensor™ and nuclei were stained with Hoechst. (B) Quantification of LysoSensor™ signal. The fluorescent signal of four randomly picked sections was determined in ImageJ and normalized to cell number (n=4). (C) <sup>13</sup>C-labeled BMP subspecies formed during <sup>13</sup>C-PG loading (n=4 biological replicates). Data are presented as mean  $\pm$  SD. Statistically significant differences in (A) were determined by one-way ANOVA and corrected for multiple comparisons against control by Bonferroni post hoc test (levels of statistically significant differences are: \*\*\*p < 0.001). Source data are provided as a Source Data file.

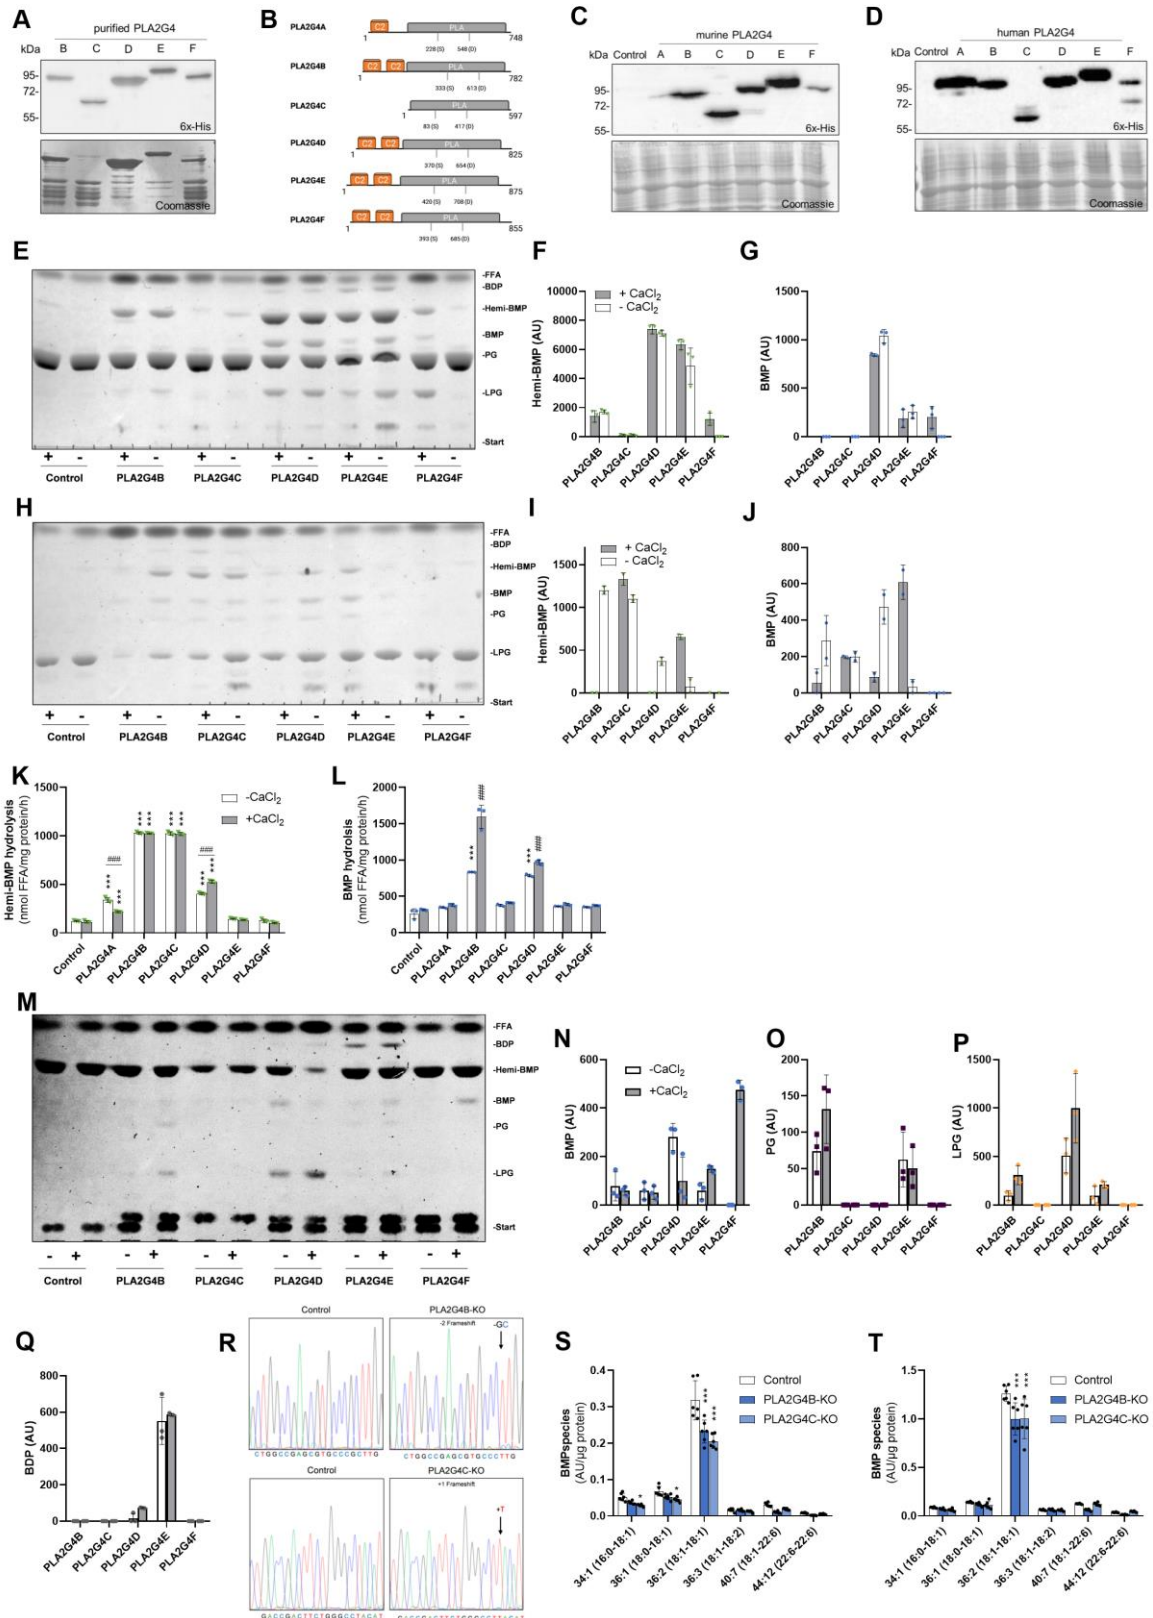

**Figure S2.** (A) Western blotting analysis of PLA2G4 enzymes enriched from lysates of Expi293F cells by affinity chromatography. Coomassie staining indicates that enzymes were partially purified. (B) Graphical illustrations of the domains and active sites of the murine PLA2G4 family. (C, D) Western blotting analysis of mouse and human PLA2G4A-F expression

in Expi293F cells. The lower image shows the Coomassie-stained blot as loading control. **(E)** Representative TLC showing reaction products of semi-purified PLA2G4B-F incubated with di-oleoyl PG in the presence and absence of CaCl<sub>2</sub>, respectively. **(F, G)** Densitometric analysis of hemi-BMP and BMP formation shown in (E) (n=3 biological replicates). **(H)** Representative TLC showing reaction products of purified PLA2G4B-F incubated with 1-oleoyl LPG in the presence and absence of CaCl<sub>2</sub>. **(I, J)** Densitometric analysis of hemi-BMP and BMP formation shown in (H) (n=2 biological replicates). In (E) – (G), the reaction mix contained 1 µg protein/assay, 1 mM phospholipid substrate, 1% FA-free BSA (pH 7.4). Samples were incubated for 1 h at 37°C. **(K, L)** Hydrolysis of tri-oleoyl hemi-BMP and di-oleoyl BMP without and with CaCl<sub>2</sub> (n=3 biological replicates). Lysates of Expi293F cells expressing recombinant murine PLA2G4 enzymes were used as source of enzymatic activity. The reaction mix (40 µl total) contained 40 µg cell protein, 0.5 mM tri-oleoyl hemi-BMP or BMP, and 1% FA-free BSA (pH 7.4). Samples were incubated for 30 min at 37°C. **(M)** Representative TLC showing the reaction products formed upon the hydrolysis of tri-oleoyl hemi-BMP using semi-purified PLA2G4 enzymes. **(N-Q)** Densitometric analysis of (M) (n=3 biological replicates). Assays were performed under conditions described in (K, L) using 1 µg recombinant protein/assay. **(R)** Verification of the CRISPR-Cas9 mediated deletion of *PLA2G4B* and *PLA2G4C*. Chromatograms of control cells and KO cells are shown. Black arrow bars highlight the region where a frameshift was introduced. **(S, T)** BMP FA-composition of control, *PLA2G4B*-KO, and *PLA2G4C*-KO cells under basal conditions and after 8 h PG supplementation (n=6 biological replicates). The labeling on the x-axis indicates the FA composition of the respective BMP subspecies (number of carbon atoms: degree of saturation). Data are shown as mean ± SD. Statistically significant differences were determined by two-way ANOVA, followed by corrections for multiple comparisons (\* = compared to the respective control, # = comparison between groups) using Bonferroni post hoc test (levels of statistically significant differences are: \*\*, ##*p* < 0.01, and \*\*\*, ###*p* < 0.001). Source data are provided as a Source Data file.

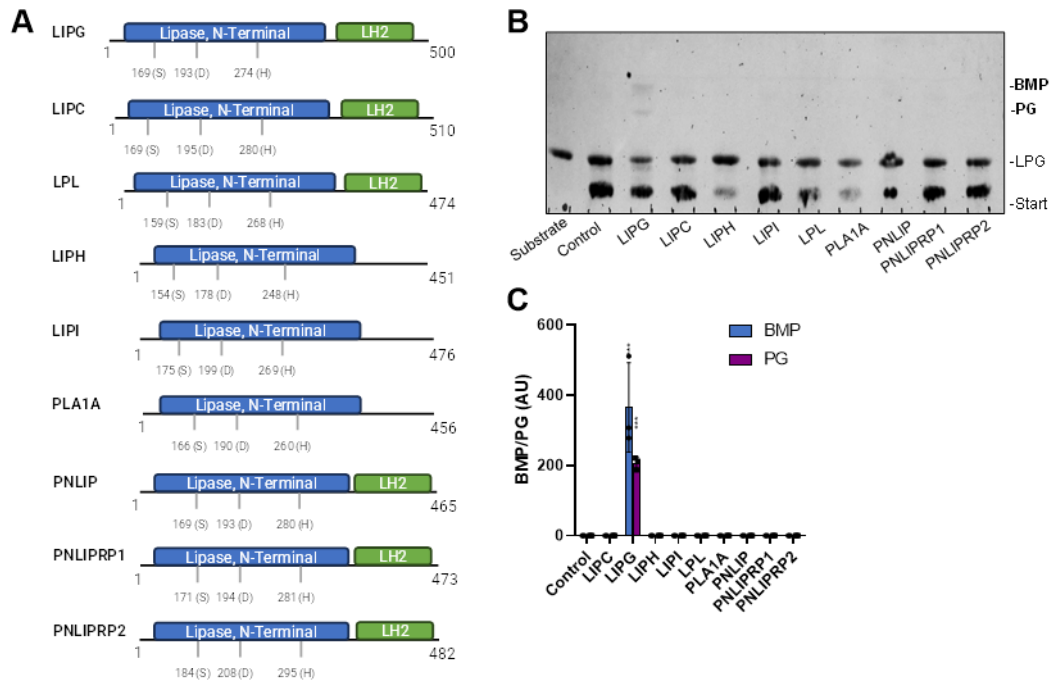

**Figure S3.** (A) Graphical illustrations of the domains and active sites of the murine PNLIP enzyme family. (B) Representative TLC showing LPG transacylase activity of PNLIP family members using 1-oleoyl LPG as substrate. The reaction mix (40  $\mu$ l total) contained 20  $\mu$ l conditioned supernatant, 0.5 mM sn-1-oleoyl LPG substrate, 1% FA-free BSA, and 20 mM HEPES (pH 7.4). Samples were incubated for 1 h at 37°C. (C) Densitometric analysis of BMP and PG formation shown in (B) (n=3 biological replicates). Data are presented as mean  $\pm$  SD. Statistically significant differences were determined by two-way ANOVA, followed by corrections for multiple comparisons versus control using Bonferroni post hoc test (levels of statistically significant differences are: \*\*\* $p < 0.001$ ). Source data are provided as a Source Data file.

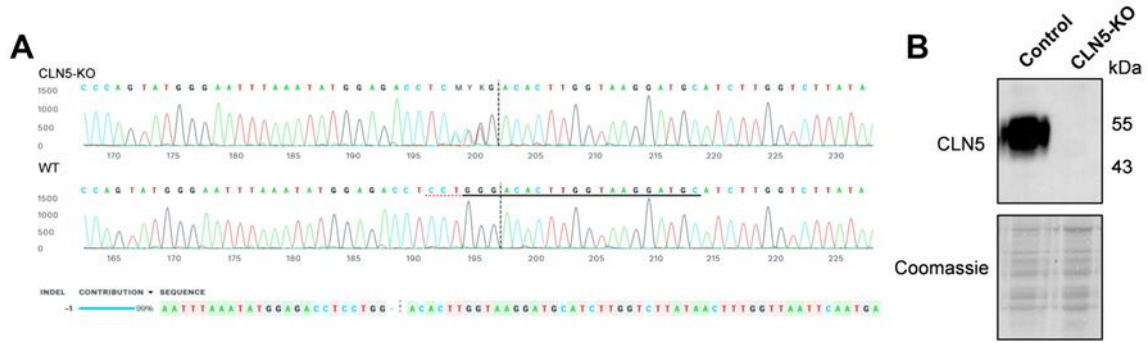

**Figure S4.** (A) Verification of CLN5 knockout in HEK293 cells by Sanger sequencing. The sequence was analyzed using the ICE CRISPR analysis tool by Synthego. (B) Verification of CLN5 knockout in HEK293 cells by Western blotting analysis. The Coomassie-stained blot was used as loading control. Source data are provided as a Source Data file.

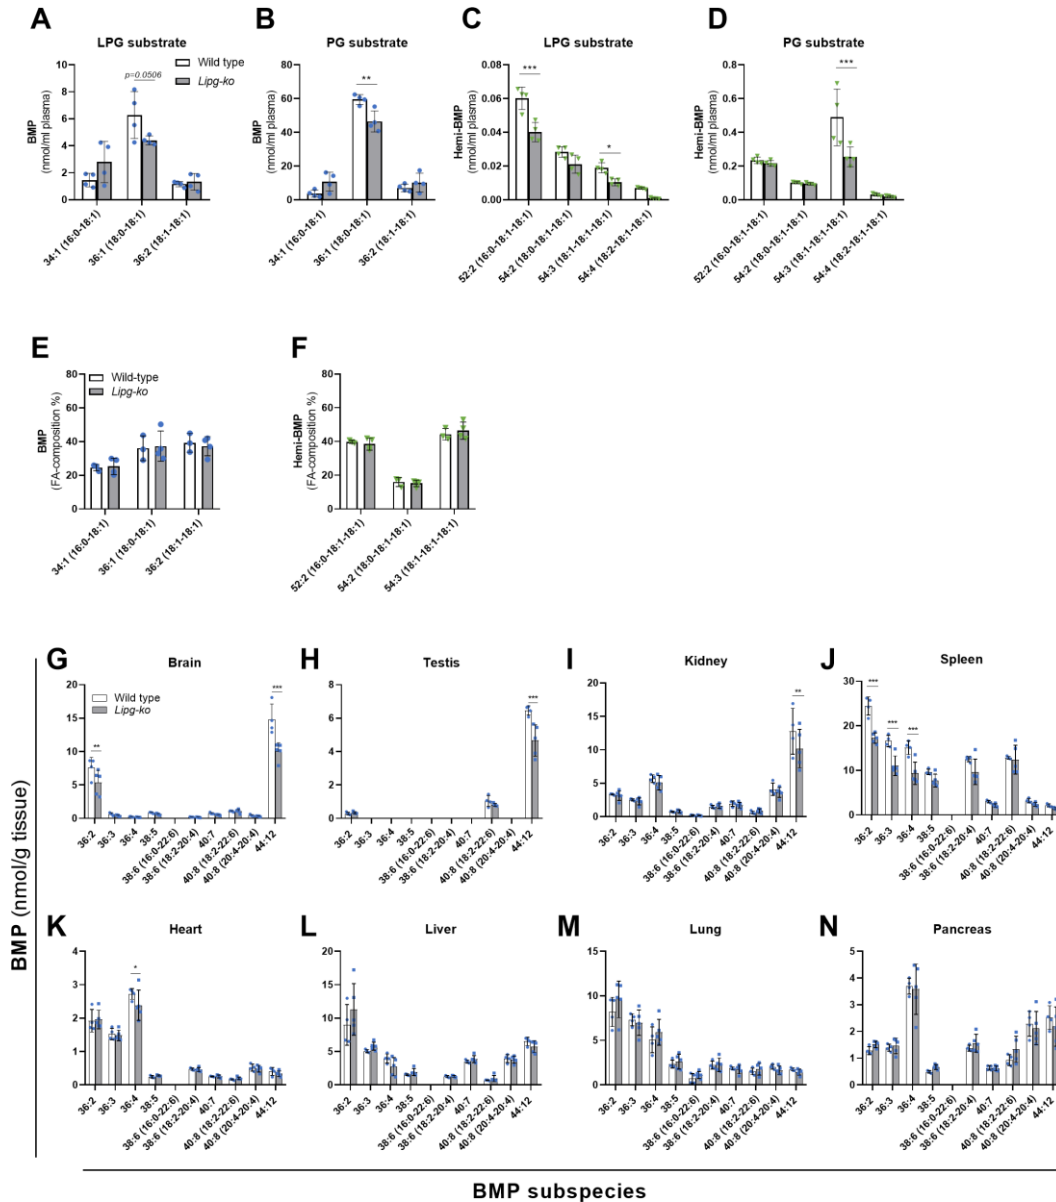

**Figure S5.** (A, B) BMP and (C, D) hemi-BMP subspecies formed in heparin-plasma of wild-type and *Lipg-ko* mice using *sn*-1-oleoyl-LPG or di-oleoyl PG as substrate (n=4). (E&F) Relative composition of plasma BMP and hemi-BMP subspecies of PG-treated wild-type and *Lipg-ko* mice (n=3 and 4, respectively). Blood samples were collected one hour after injection of di-oleoyl PG (5mg/mouse). (G-N) BMP composition of the indicated tissues obtained from wild-type (n=4) and *Lipg-ko* mice (n=5). The labeling on the x-axis indicates the FA composition of the respective BMP subspecies (number of carbon atoms: degree of saturation). Data are shown as mean  $\pm$  SD. Statistically significant differences were evaluated by two-way ANOVA, followed by corrections for multiple comparisons using Bonferroni post hoc test (levels of statistically significant differences are: \* $p < 0.05$ , \*\* $p < 0.01$ , \*\*\* $p < 0.001$ ). Source data are provided as a Source Data file.

Table S1: List of qPCR primers, gRNAs, and sequencing primers

| qPCR primer (5'-3')                                 |                            |                           |
|-----------------------------------------------------|----------------------------|---------------------------|
| Primer name                                         | Sequence                   | Reference                 |
| <i>PLA2G4A</i> Forward                              | TACCAGCACATTATAGTGGAGCA    | PrimerBank ID 113722110c1 |
| <i>PLA2G4A</i> Reverse                              | GCTGTCAGGGGTTGTAGAGAT      | PrimerBank ID 113722110c1 |
| <i>PLA2G4B</i> Forward                              | AAGCTGACAGTCCTTGATCCTG     | This paper                |
| <i>PLA2G4B</i> Reverse                              | CTTAGAGGGTAGGCGATGGG       | This paper                |
| <i>PLA2G4C</i> Forward                              | TGCCGGAGTCTCATTGTCC        | PrimerBank ID 226693353c2 |
| <i>PLA2G4C</i> Reverse                              | GGGTGAACTCGAACCAGGTC       | PrimerBank ID 226693353c2 |
| <i>PLA2G4D</i> Forward                              | GCTGACCTGTTGAGTGAGGC       | PrimerBank ID 116174753c1 |
| <i>PLA2G4D</i> Reverse                              | TCGGTGAGCGTCTTGGTCTTA      | PrimerBank ID 116174753c1 |
| <i>PLA2G4E</i> Forward                              | GCCAGACAGACTGTTTTGTGA      | PrimerBank ID 331284216c2 |
| <i>PLA2G4E</i> Reverse                              | ACTCAACTCTAGCACGTTCTTCA    | PrimerBank ID 331284216c2 |
| <i>PLA2G4F</i> Forward                              | GGCGGAAACCTACCCATAC        | PrimerBank ID 281371375c1 |
| <i>PLA2G4F</i> Reverse                              | CCACAGTTGCACATAGCAGT       | PrimerBank ID 281371375c1 |
| Guide RNAs (5'-3')                                  |                            |                           |
| gRNA name                                           | Sequence                   | Reference                 |
| <i>PLA2G4B</i> gRNA1 FW                             | CACCGGCGCCTTTAGTTGCTCCTCG  |                           |
| <i>PLA2G4B</i> gRNA1 REV                            | AAACCGAGGAGCAACTAAAGGCGCC  |                           |
| <i>PLA2G4B</i> gRNA2 FW                             | CACCGCTGGCCGAGCGTGCCCCGCTT | This paper                |
| <i>PLA2G4B</i> gRNA2 REV                            | AAACAAGCGGGCACGCTCGGCCAGC  |                           |
| <i>PLA2G4C</i> gRNA1 FW                             | CACCGTGCCGTCACGTACCTCGCAG  |                           |
| <i>PLA2G4C</i> gRNA1 REV                            | AAACCTGCGAGGTACGTGACGGCAC  |                           |
| <i>PLA2G4C</i> gRNA2 FW                             | CACCGGACCGACTTCTGGGCCTACA  |                           |
| <i>PLA2G4C</i> gRNA2 REV                            | AAACTGTAGGCCCAGAAGTCGGTCC  |                           |
| <i>CLN5</i> gRNA_1 FW                               | CACCGGCATCCTTACCAAGTGTCCC  |                           |
| <i>CLN5</i> gRNA_1 REV                              | AAACGGGACACTTGGTAAGGATGCC  |                           |
| <i>CLN5</i> gRNA_2 FW                               | CACCGAATAAGGATCAGTTTTGGA   |                           |
| <i>CLN5</i> gRNA_2 REV                              | AAACTCAAAACCTGATCCTTATTC   |                           |
| <i>CLN5</i> gRNA_3 FW                               | CACCGCATCATACCCTCCATAACT   |                           |
| <i>CLN5</i> gRNA_3 REV                              | AAACAGTTATGGAGGGTGATGATGC  |                           |
| Sequencing primers for knock-out validation (5'-3') |                            |                           |
| Primer name                                         | Sequence                   | Reference                 |
| <i>PLA2G4B</i> gRNA1 Left                           | GCTAGGAGTGGAAGCGTAAAGA     |                           |
| <i>PLA2G4B</i> gRNA1 Right                          | CAGAGGACACTCCCCAAAGAG      |                           |
| <i>PLA2G4B</i> gRNA2 Left                           | AAGACCCAGGTGACCAAGAAC      |                           |
| <i>PLA2G4B</i> gRNA2 Right                          | GATGCGTAGAACCTAAACCCAC     | This paper                |
| <i>PLA2G4C</i> gRNA1 Left                           | AGGTACCCTTCTTCTTGTCCC      |                           |
| <i>PLA2G4C</i> gRNA1 Right                          | CCCATTTATGTGTCAGAAAGCA     |                           |



---

|                            |                        |
|----------------------------|------------------------|
| <i>PLA2G4C</i> gRNA2 Left  | AGAGCCTACAGAAAACCATCCA |
| <i>PLA2G4C</i> gRNA2 Right | AAGTGCCAGATTTTGATGACT  |
| CLN5 Left                  | TTTGAATGGTCCCCTAAAAATG |
| CLN5 Right                 | CTCACCTTCCAGGAGCTAGGTA |

---

---

**Primers for site-directed mutagenesis (5'-3')**

---

| <b>Primer name</b>       | <b>Sequence</b>                | <b>Reference</b> |
|--------------------------|--------------------------------|------------------|
| <i>mLipg_S169A_fw</i>    | GATTGGCTACgcgCTTGGAGCACAC      |                  |
| <i>mLipg_S169A_re</i>    | AAGTGAACGTTCCCAAG              |                  |
| <i>mPla2g4d_S370A_fw</i> | CAGTGGCATCgcgGGCTCTACAT        |                  |
| <i>mPla2g4d_S370A_re</i> | AAGTAGGTCACACAGTCC             | This paper       |
| <i>mPla2g4e_S420A_fw</i> | CACCGGCTTGcgGGTGCAACCT         |                  |
| <i>mPla2g4e_S420A_re</i> | ATGTAAGTAGAAGCGTCCAGAAAGTTCAGC |                  |

---

Table S2: List of recombinant proteins

| Nr | Full Name                                                     | Gene Name  | Acession Number | Expression vector    | No WB | no WB/no activity |
|----|---------------------------------------------------------------|------------|-----------------|----------------------|-------|-------------------|
| 1  | patatin-like phospholipase domain containing 1                | Pnpla1     | NM_001034885.3  | pcDNA™4/HisMaxC      |       |                   |
| 2  | patatin-like phospholipase domain containing 2                | Pnpla2     | NM_001163689.1  | pcDNA™4/HisMaxC      |       |                   |
| 3  | patatin-like phospholipase domain containing 3                | Pnpla3     | NM_054088       | pcDNA™4/HisMaxC      |       |                   |
| 4  | patatin-like phospholipase domain containing 6                | Pnpla6     | NM_001122818.2  | pcDNA™4/HisMaxC      |       |                   |
| 5  | patatin-like phospholipase domain containing 7                | Pnpla7     | NM_146251.4     | pcDNA™4/HisMaxC      |       |                   |
| 6  | patatin-like phospholipase domain containing 8                | Pnpla8     | NM_026164.2     | pcDNA™4/HisMaxC      | x     | x                 |
| 7  | phospholipase A2, group VI                                    | Pla2g6     | NM_001199023.1  | pcDNA3.1(+)/myc-HisB |       |                   |
| 8  | Pancreatic Lipase                                             | Pnlip      | NM_026925.4     | pcDNA3.1(+)/myc-HisB |       |                   |
| 9  | Pancreatic Lipase Related Protein 2                           | Pnliprp2   | NM_11128.2      | pFlag-CMV-5.1        |       |                   |
| 10 | Phospholipase A2 Group VII                                    | Pla2g7     | NM_013737.5     | pcDNA3.1(+)/myc-HisB |       |                   |
| 11 | Predicted gene 13124 (AADACL4 family member 2)                | Aadacl4fm2 | NM_001085542.1  | pcDNA3.1(+)/myc-HisB | x     |                   |
| 12 | arylacetamide deacetylase like 4                              | Aadacl4    | NM_001081248.1  | pcDNA3.1(+)/myc-HisB |       |                   |
| 13 | Predicted gene 13178 (AADACL4 family member 3)                | Aadacl4fm3 | NM_001085536.2  | pcDNA3.1(+)/myc-HisB |       |                   |
| 14 | Predicted gene 436 (AADACL4 family member 4)                  | Aadacl4fm4 | NM_001085504.1  | pcDNA3.1(+)/myc-HisB | x     |                   |
| 15 | Predicted gene 438 (AADACL4 family member 5)                  | Aadacl4fm5 | NM_001126316.1  | pcDNA3.1(+)/myc-HisB | x     |                   |
| 16 | Predicted gene 5538 (AADACL2 family member 2)                 | Aadacl2fm2 | NM_001101531.1  | pcDNA3.1(+)/myc-HisB | x     |                   |
| 17 | Predicted gene 5709                                           | Gm5709     | XM_888144.5     | pcDNA3.1(+)/myc-HisB |       |                   |
| 18 | Predicted gene 8298 (AADACL2 family member 3)                 | Aadacl2fm3 | NM_001243003.1  | pcDNA3.1(+)/myc-HisB |       |                   |
| 19 | Protein Phosphatase Methylesterase 1                          | Ppme1      | NM_028292.2     | pcDNA3.1(+)/myc-HisB | x     | x                 |
| 20 | Retinoblastoma Binding Protein 9                              | Rbbp9      | NM_015754.2     | pcDNA™4/HisMaxC      | x     | x                 |
| 21 | Lipid droplet associated hydrolase                            | Ldah       | NM_172401       | pcDNA™4/HisMaxC      |       |                   |
| 22 | RIKEN cDNA 3110057012 Gene (abhydrolase domain containing 18) | Abhd18     | BC092533.1      | pcDNA3.1(+)/myc-HisB | x     |                   |

|    |                                                      |            |                |                               |   |   |
|----|------------------------------------------------------|------------|----------------|-------------------------------|---|---|
| 23 | RIKEN cDNA 9430007A20 Gene (AADACL4 family member 1) | Aadacl4fm1 | NM_198662.3    | pcDNA3.1(+)/myc-HisB          |   |   |
| 24 | RIKEN cDNA C130079G13 Gene (AADACL2 family member 1) | Aadacl2fm1 | NM_177661.3    | pcDNA3.1(+)/myc-HisB          | x |   |
| 25 | Spastic Paraplegia 21 Homolog (SPG21, maspardin)     | Spg21      | NM_138584.2    | pcDNA3.1(+)/myc-HisB          |   |   |
| 26 | Testis Expressed 30                                  | Tex30      | NM_029368.2    | pcDNA3.1(+)/myc-HisB          | x | x |
| 27 | $\alpha/\beta$ Hydrolase Domain Containing 14a       | Abhd14a    | NM_001110271.2 | pcDNA <sup>TM</sup> 4/HisMaxC | x | x |
| 28 | $\alpha/\beta$ Hydrolase Domain Containing 14b       | Abhd14b    | NM_029631      | pcDNA <sup>TM</sup> 4/HisMaxC |   |   |
| 29 | $\alpha/\beta$ Hydrolase Domain Containing 4         | Abhd4      | NM_134076.3    | pcDNA <sup>TM</sup> 4/HisMaxC |   |   |
| 30 | $\alpha/\beta$ Hydrolase Domain Containing 10        | Abhd10     | NM_172511.4    | pcDNA <sup>TM</sup> 4/HisMaxC | x | x |
| 31 | $\alpha/\beta$ Hydrolase Domain Containing 13        | Abhd13     | NM_026868.1    | pcDNA <sup>TM</sup> 4/HisMaxC | x |   |
| 32 | $\alpha/\beta$ Hydrolase Domain Containing 11        | Abhd11     | NM_145215.2    | pcDNA <sup>TM</sup> 4/HisMaxC |   |   |
| 33 | Bile Acid-CoA: Amino Acid N-Acyltransferase          | Acnat1     | NM_001164565.1 | pcDNA3.1(+)/myc-HisB          |   |   |
| 34 | Acyl-CoA Amino Acid N-Acyltransferase 2              | Acnat2     | NM_145368.3    | pcDNA3.1(+)/myc-HisB          |   |   |
| 35 | Acyl-Coenzyme A Amino Acid N-Acyltransferase 3       | Baat       | NM_007519.3    | pcDNA3.1(+)/myc-HisB          |   |   |
| 36 | Carboxypeptidase, vitellogenic-like                  | Cpvl       | NM_027749.2    | pcDNA3.1(+)/myc-HisB          |   |   |
| 37 | Carboxymethylenebutenolidase-like                    | Cmb1       | NM_181588.4    | pcDNA3.1(+)/myc-HisB          |   |   |
| 38 | Cathepsin A (Lysosomal protective protein (Mo54))    | Ctsa       | NM_001038492.2 | pcDNA3.1(+)/myc-HisB          |   |   |
| 39 | Serine carboxypeptidase 1                            | Scpep1     | NM_029023.3    | pcDNA3.1(+)/myc-HisB          |   |   |
| 40 | Acetylcholinesterase                                 | Ache       | NM_001290010.1 | pcDNA3.1(+)/myc-HisB          | x |   |
| 41 | Transmembrane protein 53                             | Tmem53     | NM_001285812.1 | pcDNA3.1(+)/myc-HisB          |   |   |
| 42 | $\alpha/\beta$ Hydrolase Domain Containing 1         | Abhd1      | NM_021304.3    | pcDNA <sup>TM</sup> 4/HisMaxC | x |   |
| 43 | Carboxylesterase 2F                                  | Ces2f      | NM_001079865.2 | pcDNA3.1(+)/myc-HisB          | x |   |
| 44 | neuroigin 2                                          | Nlgn2      | NM_198862.2    | pcDNA3.1(+)/myc-HisB          |   |   |
| 45 | Prolyl Endopeptidase                                 | Prep       | NM_011156.3    | pcDNA3.1(+)/myc-HisB          |   |   |
| 46 | phospholipase D family, member 3                     | Pld3       | NM_001317355.1 | pcDNA3.1(+)/myc-HisB          |   |   |

|    |                                                                 |         |                |                      |   |   |
|----|-----------------------------------------------------------------|---------|----------------|----------------------|---|---|
| 47 | phospholipase A2, group IVE                                     | Pla2g4e | NM_177845.4    | pcDNA3.1(+)/myc-HisB |   |   |
| 48 | N-myc downstream regulated gene 2                               | Ndrp2   | NM_013864.2    | pcDNA3.1(+)/myc-HisB |   |   |
| 49 | Arylacetamide Deacetylase-like 2                                | Aadacl2 | NM_001128091.1 | pcDNA3.1(+)/myc-HisB |   |   |
| 50 | family with sequence similarity 83, member C                    | Fam83c  | NM_027788.3    | pcDNA3.1(+)/myc-HisB |   |   |
| 51 | family with sequence similarity 83, member F                    | Fam83f  | NM_145986.2    | pcDNA3.1(+)/myc-HisB |   |   |
| 52 | Platelet Activating Factor Acetylhydrolase 2                    | Pafah2  | NM_001285872.1 | pcDNA3.1(+)/myc-HisB |   |   |
| 53 | Dipeptidylpeptidase 9                                           | Dpp9    | NM_172624.3    | pcDNA3.1(+)/myc-HisB |   |   |
| 54 | Carboxylesterase 1A                                             | Ces1a   | NM_001013764.2 | pcDNA3.1(+)/myc-HisB |   |   |
| 55 | phospholipase D family, member 4                                | Pld4    | NM_178911      | pcDNA3.1(+)/myc-HisB |   |   |
| 56 | MIT, microtubule interacting and transport, domain containing 1 | Mitd1   | NM_026913.3    | pcDNA3.1(+)/myc-HisB |   |   |
| 57 | Fatty acid amide hydrolase                                      | Faah    | NM_010173.5    | pcDNA3.1(+)/myc-HisB |   |   |
| 58 | palmitoyl-protein thioesterase 1                                | Ppt1    | NM_008917.3    | pcDNA3.1(+)/myc-HisB |   |   |
| 59 | dickkopf WNT signaling pathway inhibitor 4                      | Dkk4    | NM_145592.2    | pcDNA3.1(+)/myc-HisB | x |   |
| 60 | neuroigin 1                                                     | Nlgn1   | NM_138666.4    | pcDNA3.1(+)/myc-HisB |   |   |
| 61 | phospholipase A2, group IVB (cytosolic)                         | Pla2g4b | NM_145378      | pcDNA3.1(+)/myc-HisB |   |   |
| 62 | N-myc downstream regulated gene 1                               | Ndrp1   | NM_008681.2    | pcDNA3.1(+)/myc-HisB |   |   |
| 63 | Carboxylesterase 1H                                             | Ces1h   | NM_001370830.1 | pcDNA3.1(+)/myc-HisB |   |   |
| 64 | mesoderm specific transcript                                    | Mest    | NM_001252292.1 | pcDNA3.1(+)/myc-HisB | x |   |
| 65 | phospholipase A2, group IVC (cytosolic, calcium-independent)    | Pla2g4c | NM_001168504.1 | pcDNA3.1(+)/myc-HisB |   |   |
| 66 | phospholipase D family, member 6                                | Pld6    | NM_001290283.1 | pcDNA3.1(+)/myc-HisB |   |   |
| 67 | Esterase D/ Formylglutathione Hydrolase                         | Esd     | NM_001285423.1 | pcDNA3.1(+)/myc-HisB |   |   |
| 68 | Acetylcholinesterase                                            | Ache    | NM_001290010.1 | pcDNA3.1(+)/myc-HisB |   |   |
| 69 | family with sequence similarity 83, member G                    | Fam83g  | NM_178618.3    | pcDNA3.1(+)/myc-HisB |   |   |
| 70 | Family with Sequence Similarity 135 Member B                    | Fam135b | NM_177819.3    | pcDNA3.1(+)/myc-HisB | x | x |

|    |                                                        |         |                |                      |   |   |
|----|--------------------------------------------------------|---------|----------------|----------------------|---|---|
| 71 | glycosylphosphatidylinositol specific phospholipase D1 | Gpld1   | NM_008156.2    | pcDNA3.1(+)/myc-HisB |   |   |
| 72 | lipase, member I                                       | Lipi    | NM_001252513.1 | pcDNA3.1(+)/myc-HisB | x | x |
| 73 | family with sequence similarity 172, member A          | Fam172a | NM_138312.1    | pcDNA3.1(+)/myc-HisB |   |   |
| 74 | malonyl CoA:ACP acyltransferase (mitochondrial)        | Mcat    | NM_001030014.2 | pcDNA3.1(+)/myc-HisB |   |   |
| 75 | Acyl-CoA Thioesterase 1                                | Acot1   | NM_012006.2    | pcDNA3.1(+)/myc-HisB |   |   |
| 76 | Transmembrane and coiled-coil domain-cont prot 4       | Tmco4   | NM_001305423.1 | pcDNA3.1(+)/myc-HisB |   |   |
| 77 | Dipeptidylpeptidase 6                                  | Dpp6    | NM_010075.2    | pcDNA3.1(+)/myc-HisB |   |   |
| 78 | Family with Sequence Similarity 135 Member A           | Fam135a | NM_026604.4    | pcDNA3.1(+)/myc-HisB | x | x |
| 79 | Dipeptidylpeptidase 4                                  | Dpp4    | NM_010074.3    | pcDNA3.1(+)/myc-HisB |   |   |
| 80 | $\alpha/\beta$ Hydrolase Domain Containing 17c         | Abhd17c | NM_133722.2    | pcDNA3.1(+)/myc-HisB |   |   |
| 81 | Neuroigin 4                                            | Nlgn4l  | EF694290.1     | pcDNA3.1(+)/myc-HisB |   |   |
| 82 | Endothelial Lipase                                     | Lipg    | NM_010720.3    | pcDNA3.1(+)/myc-HisB |   |   |
| 83 | Carboxylesterase 3A                                    | Ces3a   | NM_198672.1    | pcDNA3.1(+)/myc-HisB |   |   |
| 84 | notum palmitoleoyl-protein carboxylesterase            | Notum   | NM_175263.4    | pcDNA3.1(+)/myc-HisB |   |   |
| 85 | Pyrophosphatase                                        | Ppa2    | NM_146141.2    | pcDNA3.1(+)/myc-HisB |   |   |
| 86 | Carboxylesterase 5A                                    | Ces5a   | NM_001003951.3 | pcDNA3.1(+)/myc-HisB | x |   |
| 87 | Carboxylesterase 4A                                    | Ces4a   | NM_146213.2    | pcDNA3.1(+)/myc-HisB |   |   |
| 88 | neuroigin 3                                            | Nlgn3   | NM_172932.4    | pcDNA3.1(+)/myc-HisB |   |   |
| 89 | lipase, member O2                                      | Lipo2   | NM_001322338.1 | pcDNA3.1(+)/myc-HisB | x | x |
| 90 | phospholipase D1                                       | Pld1    | NM_001164056.1 | pcDNA3.1/myc-His(-)A |   |   |
| 91 | family with sequence similarity 83, member H           | Fam83h  | NM_001168253.1 | pcDNA3.1(+)/myc-HisB |   |   |
| 92 | predicted gene 8978                                    | Gm8978  | NM_001323251.2 | pcDNA3.1(+)/myc-HisB | x |   |
| 93 | Dipeptidylpeptidase 10                                 | Dpp10   | NM_199021.3    | pcDNA3.1(+)/myc-HisB |   |   |
| 94 | phospholipase D2                                       | Pld2    | NM_001302475   | pcDNA3.1(+)/myc-HisB |   |   |

|     |                                                            |         |                |                                             |   |   |
|-----|------------------------------------------------------------|---------|----------------|---------------------------------------------|---|---|
| 95  | phospholipase A2, group IIA (platelets, synovial fluid)    | Pla2g2a | NM_001082531.1 | pcDNA3.1(+)/myc-HisB                        |   |   |
| 96  | lipase, member O3                                          | Lipo3   | NM_001013770.4 | pcDNA3.1(+)/myc-HisB                        | x | x |
| 97  | phospholipase A2, group IVD                                | Pla2g4d | NM_001024137.1 | pcDNA3.1(+)/myc-HisB                        |   |   |
| 98  | family with sequence similarity 83, member A               | Fam83a  | NM_173862.2    | pcDNA3.1(+)/myc-HisB                        |   |   |
| 99  | Post-GPI attachment to proteins 1                          | Pgap1   | NM_001163314.2 | pcDNA3.1(+)/myc-HisB                        |   |   |
| 100 | prokineticin 2                                             | Prok2   | NM_015768.2    | pcDNA3.1(+)/myc-HisB                        |   |   |
| 101 | epoxide hydrolase 2, cytoplasmic                           | Ephx2   | NM_007940.4    | pcDNA3.1(+)/myc-HisB                        |   |   |
| 102 | palmitoyl-protein thioesterase 2                           | Ppt2    | NM_001302393.1 | pcDNA3.1(+)/myc-HisB                        |   |   |
| 103 | family with sequence similarity 83, member B               | Fam83b  | NM_001045518.2 | pcDNA3.1(+)/myc-HisB                        |   |   |
| 104 | Diacylglycerol Lipase alpha                                | Dagla   | NM_198114.2    | pcDNA3.1(+)/myc-HisB                        |   |   |
| 105 | lipase, member O1                                          | Lipo1   | NM_001323065.1 | pcDNA3.1(+)/myc-HisB                        | x | x |
| 106 | Dipeptidylpeptidase 8                                      | Dpp8    | NM_028906.2    | pcDNA3.1(+)/myc-HisB                        |   |   |
| 107 | prolylcarboxypeptidase (angiotensinase C)                  | Prpc    | NM_028243.3    | pcDNA3.1(+)/myc-HisB                        |   |   |
| 108 | phospholipase A2, group IVA (cytosolic, calcium-dependent) | Pla2g4a | NM_008869      | pcDNA3.1(+)/myc-HisB                        |   |   |
| 109 | N-myc downstream regulated gene 3                          | Ndr3    | NM_180956.1    | pcDNA3.1(+)/myc-HisB                        |   |   |
| 110 | family with sequence similarity 83, member E               | Fam83e  | NM_001033170.4 | pcDNA3.1(+)/myc-HisB                        |   |   |
| 111 | N-myc downstream regulated gene 4                          | Ndr4    | NM_145602.4    | pcDNA3.1(+)/myc-HisB                        |   |   |
| 112 | colipase, pancreatic                                       | Clps    | NM_025469.3    | pcDNA3.1(+)/myc-HisB                        |   |   |
| 113 | protease, serine 16 (thymus)                               | Prss16  | NM_019429.2    | pcDNA3.1(+)/myc-HisB                        |   |   |
| 114 | KAT8 regulatory NSL complex subunit 3                      | Kansl3  | NM_001310513.1 | pcDNA3.1(+)/myc-HisB                        |   |   |
| 115 | phospholipase D family, member 5                           | Pld5    | NM_176916.4    | pcDNA3.1(+)/myc-HisB                        |   |   |
| 116 | Phospholipase A2, group XV                                 | Pla2g15 | NM_133792.3    | pcDNA3.1(+)/myc-HisB                        |   |   |
| 117 | Acyl-CoA Thioesterase 6                                    | Acot6   | NM_172580.1    | pcDNA <sup>TM</sup> 4/HisMa <sup>+</sup> xC |   |   |
| 118 | Arylacetamide Deacetylase-like 3                           | Aadacl3 | NM_001085503.2 | pcDNA3.1(+)/myc-HisB                        | x | x |

|     |                                                |       |                |                      |   |   |
|-----|------------------------------------------------|-------|----------------|----------------------|---|---|
| 119 | Candidate tumor suppressor in ovarian cancer 2 | Ovca2 | NM_027136.3    | pcDNA3.1(+)/myc-HisB |   |   |
| 120 | Arylacetamide Deacetylase/Esterase             | Aadac | NM_023383.1    | pcDNA3.1(+)/myc-HisB | x |   |
| 121 | Arylformamidase                                | Afmid | NM_027827.3    | pcDNA3.1(+)/myc-HisB |   |   |
| 122 | Acyl-CoA Thioesterase 5                        | Acot5 | NM_145444.3    | pcDNA™4/HisMaxC      |   |   |
| 123 | $\alpha/\beta$ Hydrolase Domain Containing 8   | Abhd8 | NM_022419.3    | pcDNA™4/HisMaxC      |   |   |
| 124 | Acyl-CoA Thioesterase 4                        | Acot4 | NM_134247.3    | pcDNA™4/HisMaxC      |   |   |
| 125 | Biphenyl Hydrolase-like                        | Bphl  | NM_026512.1    | pcDNA3.1(+)/myc-HisB |   |   |
| 126 | Butyrylcholinesterase                          | Bche  | NM_009738      | pcDNA3.1(+)/myc-HisB | x |   |
| 127 | Carboxyl Ester Lipase                          | Cel   | NM_009885.2    | pcDNA3.1(+)/myc-HisB |   |   |
| 128 | Carboxylesterase 2B                            | Ces2b | NM_198171.3    | pcDNA3.1(+)/myc-HisB |   |   |
| 129 | Carboxylesterase 1B                            | Ces1b | NM_001081372.1 | pcDNA3.1(+)/myc-HisB |   |   |
| 130 | Carboxylesterase 1F                            | Ces1f | NM_144930.2    | pcDNA™4/HisMaxC      | x | x |
| 131 | Carboxylesterase 2A                            | Ces2a | NM_133960.5    | pFlag-CMV-5.1        |   |   |
| 132 | Carboxylesterase 1D                            | Ces1d | NM_053200.2    | pFlag-CMV-5.1        |   |   |
| 133 | Carboxylesterase 2G                            | Ces2g | NM_197999.2    | pFlag-CMV-5.1        | x |   |
| 134 | Carboxylesterase 2C                            | Ces2c | NM_145603.2    | pFlag-CMV-5.1        |   |   |
| 135 | Carboxylesterase 1E                            | Ces1e | NM_133660.3    | pcDNA™4/HisMaxC      | x |   |
| 136 | Carboxylesterase 2H                            | Ces2h | NM_001272045.2 | pcDNA3.1(+)/myc-HisB | x | x |
| 137 | Carboxylesterase 1G                            | Ces1g | NM_021456.4    | pcDNA™4/HisMaxC      | x |   |
| 138 | Carboxylesterase 3B                            | Ces3b | NM_144511.2    | pcDNA™4/HisMaxC      | x |   |
| 139 | Carboxylesterase 1C                            | Ces1c | NM_007954.4    | pcDNA™4/HisMaxC      | x |   |
| 140 | Diacylglycerol Lipase beta                     | Daglb | NM_144915.3    | pcDNA™4/HisMaxC      | x |   |
| 141 | Dipeptidylpeptidase 7                          | Dpp7  | NM_031843.2    | pcDNA3.1(+)/myc-HisB | x | x |
| 142 | Lipase Family Member K                         | Lipk  | NM_172837.4    | pcDNA™4/HisMaxC      | x |   |
| 143 | Lecithin Cholesterol Acyltransferase           | Lcat  | NM_008490.2    | pcDNA3.1(+)/myc-HisB |   |   |

|     |                                                |          |                          |                                  |   |  |
|-----|------------------------------------------------|----------|--------------------------|----------------------------------|---|--|
| 144 | Lipase Family Member M                         | Lipm     | NM_023903.1              | pcDNA <sup>™</sup> 4/HisMa<br>xC | x |  |
| 145 | Lipase Family Member N                         | Lipn     | NM_027340.2              | pFlag-CMV-5.1                    | x |  |
| 146 | Gastric Lipase                                 | Lipf     | NM_026334.3              | pcDNA3.1(+)/my<br>c-HisB         |   |  |
| 147 | Hepatic Lipase                                 | Lipc     | NM_008280.2              | pcDNA3.1(+)/my<br>c-HisB         |   |  |
| 148 | Fibroblast Activation Protein                  | Fap      | NM_007986.3              | pcDNA3.1(+)/my<br>c-HisB         | x |  |
| 149 | Lipase Member O4                               | Lipo4    | NM_001323386.1           | pcDNA <sup>™</sup> 4/HisMa<br>xC |   |  |
| 150 | Lipase Member H                                | Liph     | NM_001083894.1           | pcDNA <sup>™</sup> 4/HisMa<br>xC | x |  |
| 151 | Lipoprotein Lipase                             | Lpl      | NM_008509.2              | pcDNA <sup>™</sup> 4/HisMa<br>xC |   |  |
| 152 | Lysophospholipase 1                            | Lypla1   | NM_008866.3              | pcDNA3.1(+)/my<br>c-HisB         |   |  |
| 153 | Lysophospholipase-like Protein                 | Lyplal1  | NM_146106.2              | pcDNA3.1(+)/my<br>c-HisB         |   |  |
| 154 | Lysophospholipase 2                            | Lypla2   | NM_011942.1              | pcDNA <sup>™</sup> 4/HisMa<br>xC |   |  |
| 155 | Lysosomal Acid Lipase A                        | Lipa     | NM_021460.3              | pcDNA <sup>™</sup> 4/HisMa<br>xC | x |  |
| 156 | Monoglycerid Lipase                            | Mgl      | NM_001166251.1           | pcDNA <sup>™</sup> 4/HisMa<br>xC |   |  |
| 157 | Neutral Cholesterol Ester Hydrolase 1          | Nceh1    | NM_178772.3              | pcDNA <sup>™</sup> 4/HisMa<br>xC |   |  |
| 158 | Oleoyl-ACP Hydrolase                           | Olah     | NM_145921.1              | pcDNA3.1(+)/my<br>c-HisB         |   |  |
| 159 | Hormone Sensitive Lipase                       | Lipe     | NM_010719.5              | pcDNA <sup>™</sup> 4/HisMa<br>xC |   |  |
| 160 | $\alpha/\beta$ Hydrolase Domain Containing 16a | Abhd16a  | NM_178592.3              | pcDNA <sup>™</sup> 4/HisMa<br>xC | x |  |
| 161 | Carboxylesterase 2E                            | Ces2e    | NM_172759.3              | pFlag-CMV-5.1                    | x |  |
| 162 | phospholipase A2, group IB, pancreas           | Pla2g1b  | XM_006538948.2           | pcDNA3.1(+)/my<br>c-HisB         |   |  |
| 163 | phospholipase A2, group IIE                    | Pla2g2e  | NM_012044.2<br>(correct) | pcDNA3.1(+)/my<br>c-HisB         |   |  |
| 164 | phospholipase A2, group XIIB                   | Pla2g12b | NM_023530.2              | pcDNA3.1(+)/my<br>c-HisB         |   |  |
| 165 | phospholipase A2, group XIA                    | Pla2g12a | NM_001286948.1           | pcDNA3.1(+)/my<br>c-HisB         |   |  |
| 166 | phospholipase A2, group III                    | Pla2g3   | NM_172791.2              | pcDNA3.1(+)/my<br>c-HisB         |   |  |
| 167 | phospholipase A2, group X                      | Pla2g10  | NM_001291009.2           | pcDNA3.1(+)/my<br>c-HisB         |   |  |



|     |                                                                    |          |                |                              |   |   |
|-----|--------------------------------------------------------------------|----------|----------------|------------------------------|---|---|
| 168 | phospholipase A2, group IIC                                        | Pla2g2c  | NM_008868.3    | pcDNA3.1(+)/myc-HisB         |   |   |
| 169 | otoconin 90                                                        | Oc90     | NM_010953.2    | pcDNA3.1(+)/myc-HisB         |   |   |
| 170 | phospholipase A2, group IIF                                        | Pla2g2f  | NM_012045.4    | pcDNA3.1(+)/myc-HisB         | x |   |
| 171 | $\alpha/\beta$ Hydrolase Domain Containing 17a                     | Abhd17a  | NM_145421.2    | pcDNA <sup>™</sup> 4/HisMaxC |   |   |
| 172 | $\alpha/\beta$ Hydrolase Domain Containing 17b                     | Abhd17b  | NM_146096.3    | pcDNA <sup>™</sup> 4/HisMaxC | x | x |
| 173 | $\alpha/\beta$ Hydrolase Domain Containing 5                       | Abhd5    | NM_026179.2    | pcDNA <sup>™</sup> 4/HisMaxC |   |   |
| 174 | phospholipase A2, group IID                                        | Pla2g2d  | NM_011109.2    | pcDNA3.1(+)/myc-HisB         |   |   |
| 175 | $\alpha/\beta$ Hydrolase Domain Containing 3                       | Abhd3    | NM_134130.1    | pcDNA <sup>™</sup> 4/HisMaxC |   |   |
| 176 | $\alpha/\beta$ Hydrolase Domain Containing 16b                     | Abhd16b  | NM_183181.2    | pcDNA <sup>™</sup> 4/HisMaxC |   |   |
| 177 | $\alpha/\beta$ Hydrolase Domain Containing 12b                     | Abhd12b  | NM_001195033.2 | pcDNA <sup>™</sup> 4/HisMaxC |   |   |
| 178 | Acyl-CoA Thioesterase 3                                            | Acot3    | NM_134246.3    | pcDNA <sup>™</sup> 4/HisMaxC |   |   |
| 179 | patatin-like phospholipase domain containing 5                     | Pnpla5   | NM_029427.1    | pcDNA <sup>™</sup> 4/HisMaxC |   |   |
| 180 | Pancreatic Lipase Related Protein 1                                | Pnliprp1 | NM_018874.2    | pFlag-CMV-5.1                |   |   |
| 181 | Phospholipase A1 Member A                                          | Pla1a    | NM_134102.4    | pcDNA3.1(+)/myc-HisB         |   |   |
| 182 | $\alpha/\beta$ Hydrolase Domain Containing 9 (epoxide hydrolase 3) | Ephx3    | NM_001033163.4 | pcDNA <sup>™</sup> 4/HisMaxC |   |   |
| 183 | $\alpha/\beta$ Hydrolase Domain Containing 7 (epoxide hydrolase 4) | Ephx4    | NM_001001804.2 | pcDNA <sup>™</sup> 4/HisMaxC |   |   |
| 184 | Serine Hydrolase-like                                              | Serhl    | NM_023475.3    | pcDNA3.1(+)/myc-HisB         |   |   |
| 185 | epoxide hydrolase 1, microsomal                                    | Ephx1    | NM_010145.3    | pcDNA3.1(+)/myc-HisB         |   |   |
| 186 | Serine active site containing 1                                    | Serac1   | NM_001111017.1 | pcDNA3.1(+)/myc-HisB         | x |   |
| 187 | phospholipase A2, group IVF                                        | Pla2g4f  | NM_001024145.3 | pcDNA3.1(+)/myc-HisB         |   |   |
| 188 | prokineticin 1                                                     | Prok1    | NM_001044382.2 | pcDNA3.1(+)/myc-HisB         |   |   |
| 189 | prolyl endopeptidase-like                                          | Prepl    | NM_001163622.1 | pcDNA3.1(+)/myc-HisB         |   |   |
| 190 | family with sequence similarity 83, member D                       | Fam83d   | NM_027975.2    | pcDNA3.1(+)/myc-HisB         | x | x |
| 191 | phospholipase A2, group V                                          | Pla2g5   | NM_001122954.1 | pcDNA3.1(+)/myc-HisB         |   |   |

|                                   |                                                                         |                  |                        |                              |   |   |
|-----------------------------------|-------------------------------------------------------------------------|------------------|------------------------|------------------------------|---|---|
| 192                               | $\alpha/\beta$ Hydrolase Domain Containing 15                           | Abhd15           | NM_026185.4            | pcDNA <sup>™</sup> 4/HisMaxC |   |   |
| 193                               | $\alpha/\beta$ Hydrolase Domain Containing 12                           | Abhd12           | NM_024465.3            | pcDNA <sup>™</sup> 4/HisMaxC |   |   |
| 194                               | $\alpha/\beta$ Hydrolase Domain Containing 2                            | Abhd2            | NM_018811.6            | pcDNA <sup>™</sup> 4/HisMaxC |   |   |
| 195                               | Acyl-CoA Thioesterase 2                                                 | Acot2            | NM_134188.3            | pcDNA <sup>™</sup> 4/HisMaxC | x |   |
| 196                               | androgen-induced gene 1 protein                                         | Aig1             | NM_025446.4            | pcDNA3.1(+)/myc-HisB         |   |   |
| 197                               | androgen-dependent TFPI-regulating protein                              | Adtrp            | NM_001145875           | pcDNA3.1(+)/myc-HisB         |   |   |
| 198                               | Acylpeptide Hydrolase                                                   | Apeh             | NM_146226.2            | pcDNA3.1(+)/myc-HisB         |   |   |
| 199                               | $\alpha/\beta$ Hydrolase Domain Containing 6                            | Abhd6            | NM_025341.3            | pcDNA <sup>™</sup> 4/HisMaxC |   |   |
| 200                               | phospholipase B domain containing 2 (Plbd2)                             | Plbd2            | NM_023625.4            | pcDNA <sup>™</sup> 4/HisMaxC | x | x |
| 201                               | phospholipase A and acyltransferase 1                                   | Plaat1           | NM_020386.4:92-913     | pcDNA3.1(+)/myc-His C        |   |   |
| 202                               | phospholipase A and acyltransferase 2                                   | Plaat2           | NM_017878.1:60-548     | pcDNA3.1(+)/myc-His C        | x |   |
| 203                               | phospholipase A and acyltransferase 3                                   | Plaat3           | NM_001128203.1:140-628 | pcDNA3.1(+)/myc-His C        |   |   |
| 204                               | phospholipase A and acyltransferase 4                                   | Plaat4           | NM_004585.4:69-563     | pcDNA3.1(+)/myc-His C        |   |   |
| 205                               | phospholipase A and acyltransferase 5                                   | Plaat5           | NM_001146728.1:175-936 | pcDNA3.1(+)/myc-His C        |   |   |
| 206                               | lecithin-retinol acyltransferase                                        | Lrat             | NM_023624.4            | pcDNA <sup>™</sup> 4/HisMaxC |   |   |
| no Westernblot signal no activity |                                                                         |                  |                        |                              |   |   |
|                                   | total                                                                   | no wb signal     | no wb no activity      |                              |   |   |
| #                                 | 206                                                                     | 53               | 19                     |                              |   |   |
| %                                 | 100                                                                     | 25,7             | 9,2                    |                              |   |   |
|                                   |                                                                         | 74,3             | 90,8                   |                              |   |   |
| <b>Human PLA2G4 Constructs</b>    |                                                                         |                  |                        |                              |   |   |
|                                   | <b>Full Name</b>                                                        | <b>Gene Name</b> | <b>Acession Number</b> | <b>Expression vector</b>     |   |   |
|                                   | Homo sapiens phospholipase A2 group IVA (PLA2G4A), transcript variant 1 | PLA2G4A          | NM_024420.3            | pcDNA3.1(+)/myc-His C        |   |   |
|                                   | Homo sapiens phospholipase A2 group IVB (PLA2G4B)                       | PLA2G4B          | NM_001114633.2         | pcDNA3.1(+)/myc-His C        |   |   |

|  |                                                                         |         |                |                       |  |  |
|--|-------------------------------------------------------------------------|---------|----------------|-----------------------|--|--|
|  | Homo sapiens phospholipase A2 group IVC (PLA2G4C), transcript variant 1 | PLA2G4C | NM_003706.3    | pcDNA3.1(+)/myc-His C |  |  |
|  | Homo sapiens phospholipase A2 group IVD (PLA2G4D)                       | PLA2G4D | NM_178034.4    | pcDNA3.1(+)/myc-His C |  |  |
|  |                                                                         |         |                |                       |  |  |
|  | Homo sapiens phospholipase A2 group IVE (PLA2G4E), transcript variant 1 | PLA2G4E | NM_001206670.1 | pcDNA3.1(+)/myc-His C |  |  |
|  | Homo sapiens phospholipase A2 group IVF (PLA2G4F), transcript variant 1 | PLA2G4F | NM_213600.4    | pcDNA3.1(+)/myc-His C |  |  |

Table S3: MRM-Transition list

| Compound Name        | Prec Ion | Prod Ion | Frag (V) | CE (V) | Cell Acc (V) | Polarity |
|----------------------|----------|----------|----------|--------|--------------|----------|
| BDP 18_1             | 1321.1   | 603.4    | 120      | 27     | 4            | Positive |
| BMP 28:0 (14:0-14:0) | 667.4    | 285.2    | 135      | 25     | 5            | Positive |
| BMP 28:0 (14:0-14:0) | 665.4    | 227.2    | 250      | 35     | 4            | Negative |
| BMP 32:0 (16:0-16:0) | 723.5    | 313.2    | 135      | 25     | 5            | Positive |
| BMP 32:0 (16:0-16:0) | 721.5    | 255.2    | 250      | 35     | 4            | Negative |
| BMP 32:1 (16:0-16:1) | 721.5    | 311.2    | 135      | 35     | 5            | Positive |
| BMP 32:1 (16:0-16:1) | 719.5    | 253.2    | 250      | 35     | 4            | Negative |
| BMP 34:0 (16:0-18:0) | 751.5    | 341.3    | 135      | 25     | 5            | Positive |
| BMP 34:0 (16:0-18:0) | 749.5    | 283.2    | 250      | 35     | 4            | Negative |
| BMP 34:1 (16:0-18:1) | 749.5    | 339.3    | 135      | 25     | 5            | Positive |
| BMP 34:1 (16:0-18:1) | 747.51   | 281.2    | 250      | 35     | 4            | Negative |
| BMP 34:2 (16:0-18:2) | 747.5    | 337.3    | 135      | 25     | 5            | Positive |
| BMP 34:2 (16:0-18:2) | 745.5    | 279.2    | 250      | 35     | 4            | Negative |
| BMP 36:0 (18:0-18:0) | 779.5    | 341.3    | 135      | 25     | 5            | Positive |
| BMP 36:0 (18:0-18:0) | 777.5    | 283.2    | 250      | 35     | 4            | Negative |
| BMP 36:1 (18:0-18:1) | 777.5    | 341.3    | 135      | 25     | 5            | Positive |
| BMP 36:1 (18:0-18:1) | 775.5    | 283.2    | 250      | 35     | 4            | Negative |
| BMP 36:2 (18:1-18:1) | 775.5    | 339.3    | 135      | 25     | 5            | Positive |
| BMP 36:2 (18:1-18:1) | 773.5    | 281.24   | 250      | 35     | 4            | Negative |
| BMP 36:3 (18:1-18:2) | 773.5    | 339.3    | 135      | 25     | 5            | Positive |
| BMP 36:3 (18:1-18:2) | 771.5    | 279.2    | 250      | 35     | 4            | Negative |
| BMP 36:4 (18:2-18:2) | 771.5    | 337.3    | 135      | 25     | 5            | Positive |
| BMP 36:4 (18:2-18:2) | 769.5    | 279.23   | 250      | 35     | 4            | Negative |
| BMP 36:5 (18:2-18:3) | 769.5    | 335.25   | 135      | 25     | 5            | Positive |
| BMP 36:5 (18:2-18:3) | 767.5    | 277.2    | 250      | 35     | 4            | Negative |
| BMP 38:4 (18:0-20:4) | 799.5    | 361.3    | 135      | 25     | 5            | Positive |
| BMP 38:4 (18:0-20:4) | 797.5    | 303.2    | 250      | 35     | 4            | Negative |
| BMP 38:5 (18:1-20:4) | 797.5    | 361.3    | 135      | 25     | 5            | Positive |
| BMP 38:5 (18:1-20:4) | 795.5    | 303.23   | 250      | 35     | 4            | Negative |
| BMP 38:5 (18:2-20:3) | 797.5    | 363.3    | 135      | 25     | 5            | Positive |
| BMP 38:5 (18:2-20:3) | 795.5    | 305.2    | 250      | 35     | 4            | Negative |
| BMP 38:6 (16:0-22:6) | 795.5    | 313.2    | 135      | 25     | 5            | Positive |
| BMP 38:6 (16:0-22:6) | 793.5    | 255.2    | 250      | 35     | 4            | Negative |
| BMP 38:6 (18:2-20:4) | 795.5    | 361.3    | 135      | 25     | 5            | Positive |
| BMP 38:6 (18:2-20:4) | 793.5    | 303.23   | 250      | 35     | 4            | Negative |
| BMP 38:7 (16:1-22:6) | 793.5    | 385.3    | 135      | 25     | 5            | Positive |
| BMP 38:7 (16:1-22:6) | 791.48   | 327.23   | 250      | 35     | 4            | Negative |
| BMP 38:7 (18:3-20:4) | 793.5    | 335.25   | 135      | 25     | 5            | Positive |
| BMP 38:7 (18:3-20:4) | 791.48   | 277.2    | 250      | 35     | 4            | Negative |
| BMP 40:5 (18:1-22:4) | 825.5    | 389.3    | 135      | 25     | 5            | Positive |
| BMP 40:5 (18:1-22:4) | 823.5    | 331.3    | 250      | 35     | 4            | Negative |
| BMP 40:6 (18:1-22:5) | 823.5    | 387.28   | 135      | 25     | 5            | Positive |
| BMP 40:6 (18:1-22:5) | 821.5    | 329.3    | 250      | 35     | 4            | Negative |
| BMP 40:6 (18:2-22:4) | 823.5    | 389.23   | 135      | 25     | 5            | Positive |
| BMP 40:6 (18:2-22:4) | 821.5    | 331.3    | 250      | 35     | 4            | Negative |
| BMP 40:7 (18:1-22:6) | 821.5    | 385.2    | 135      | 25     | 5            | Positive |
| BMP 40:7 (18:1-22:6) | 819.5    | 327.23   | 250      | 35     | 4            | Negative |
| BMP 40:7 (18:2-22:5) | 819.5    | 329.2    | 250      | 35     | 4            | Negative |
| BMP 40:7 (18:2-22:5) | 821.5    | 387.2    | 135      | 25     | 5            | Positive |
| BMP 40:8 (18:2-22:6) | 819.5    | 385.2    | 135      | 25     | 5            | Positive |
| BMP 40:8 (18:2-22:6) | 817.5    | 303.23   | 250      | 35     | 4            | Negative |
| BMP 40:8 (20:4-20:4) | 819.5    | 361.3    | 135      | 25     | 5            | Positive |
| BMP 40:8 (20:4-20:4) | 817.5    | 327.23   | 250      | 35     | 4            | Negative |

|                                |         |        |     |    |   |          |
|--------------------------------|---------|--------|-----|----|---|----------|
| BMP 40:9 (18:3-22:6)           | 817.48  | 335.25 | 135 | 25 | 5 | Positive |
| BMP 40:9 (18:3-22:6)           | 815.48  | 277.3  | 250 | 35 | 4 | Negative |
| BMP 42:10 (20:4-22:6)          | 843.5   | 385.3  | 135 | 25 | 5 | Positive |
| BMP 42:10 (20:4-22:6)          | 841.5   | 327.23 | 250 | 35 | 4 | Negative |
| BMP 42:8 (20:4-22:4)           | 847.5   | 361.2  | 135 | 25 | 5 | Positive |
| BMP 42:8 (20:4-22:4)           | 845.5   | 303.2  | 250 | 35 | 4 | Negative |
| BMP 42:9 (20:3-22:6)           | 845.5   | 385.3  | 135 | 25 | 5 | Positive |
| BMP 42:9 (20:3-22:6)           | 843.5   | 327.2  | 250 | 35 | 4 | Negative |
| BMP 44:10 (22:4-22:6)          | 871.5   | 389.3  | 135 | 25 | 5 | Positive |
| BMP 44:10 (22:4-22:6)          | 869.5   | 331.2  | 250 | 35 | 4 | Negative |
| BMP 44:11 (22:5-22:6)          | 869.5   | 387.3  | 135 | 25 | 5 | Positive |
| BMP 44:11 (22:5-22:6)          | 867.5   | 329.2  | 250 | 35 | 4 | Negative |
| BMP 44:12 (22:6-22:6)          | 867.5   | 385.2  | 135 | 25 | 5 | Positive |
| BMP 44:12 (22:6-22:6)          | 865.5   | 327.2  | 250 | 35 | 4 | Negative |
| Hemi BMP 14:0                  | 894.67  | 894.67 | 135 | 0  | 5 | Positive |
| Hemi BMP 14:0                  | 894.67  | 495.4  | 135 | 25 | 5 | Positive |
| Hemi BMP 14:0 (14:0-14:0-14:0) | 875.63  | 227.2  | 290 | 44 | 4 | Negative |
| Hemi-BMP 52:2 (16:0-18:1-18:1) | 1030.8  | 1030.8 | 135 | 0  | 5 | Positive |
| Hemi-BMP 52:2 (16:0-18:1-18:1) | 1030.8  | 603.4  | 135 | 27 | 5 | Positive |
| Hemi-BMP 52:2 (16:0-18:1-18:1) | 1011.76 | 281.2  | 290 | 44 | 4 | Negative |
| Hemi-BMP 54:2 (18:0-18:1-18:1) | 1058.8  | 1058.8 | 135 | 0  | 5 | Positive |
| Hemi-BMP 54:2 (18:0-18:1-18:1) | 1058.8  | 603.4  | 135 | 27 | 5 | Positive |
| Hemi-BMP 52:2 (16:0-18:1-18:1) | 1011.76 | 255.2  | 290 | 44 | 4 | Negative |
| Hemi-BMP 54:2 (18:0-18:1-18:1) | 1039.79 | 283.2  | 290 | 44 | 4 | Negative |
| Hemi-BMP 54:2 (18:0-18:1-18:1) | 1039.79 | 281.2  | 290 | 44 | 4 | Negative |
| Hemi-BMP 54:3 (18:1-18:1-18:1) | 1056.8  | 1056.8 | 135 | 0  | 5 | Positive |
| Hemi-BMP 54:3 (18:1-18:1-18:1) | 1056.8  | 603.4  | 135 | 25 | 5 | Positive |
| Hemi-BMP 54:3 (18:1-18:1-18:1) | 1037.7  | 281.2  | 290 | 44 | 4 | Negative |
| Hemi-BMP 54:4 (18:2-18:1-18:1) | 1054.8  | 1054.8 | 135 | 0  | 5 | Positive |
| Hemi-BMP 54:4 (18:2-18:1-18:1) | 1054.8  | 603.4  | 135 | 27 | 5 | Positive |
| Hemi-BMP 54:4 (18:2-18:1-18:1) | 1035.76 | 281.2  | 290 | 44 | 4 | Negative |
| Hemi-BMP 54:4 (18:2-18:1-18:1) | 1035.76 | 279.2  | 290 | 44 | 4 | Negative |
| LPG 14:0                       | 455.24  | 227.2  | 180 | 28 | 4 | Negative |
| LPG 16:0                       | 483.27  | 255.2  | 180 | 28 | 4 | Negative |
| LPG 16:1                       | 481.25  | 253.2  | 180 | 28 | 4 | Negative |
| LPG 17:1                       | 495.2   | 267.2  | 180 | 28 | 4 | Negative |
| LPG 18:0                       | 511.3   | 283.2  | 180 | 28 | 4 | Negative |
| LPG 18:1                       | 509.28  | 281.2  | 180 | 28 | 4 | Negative |
| LPG 18:2                       | 507.27  | 279.2  | 180 | 28 | 4 | Negative |
| LPG 20:4                       | 531.27  | 303.2  | 180 | 28 | 4 | Negative |
| LPG 22:6                       | 555.27  | 327.2  | 180 | 28 | 4 | Negative |
| PG 32:0 (16:0-16:0)            | 740.5   | 551.5  | 135 | 15 | 5 | Positive |
| PG 32:0 (16:0-16:0)            | 721.48  | 255.2  | 300 | 45 | 4 | Negative |
| PG 32:1 (16:0-16:1)            | 738.5   | 549.48 | 135 | 15 | 5 | Positive |
| PG 32:1 (16:0-16:1)            | 719.48  | 253.2  | 300 | 45 | 4 | Negative |
| PG 34:0 (17:0-17:0)            | 768.5   | 579.5  | 135 | 15 | 5 | Positive |
| PG 34:0 (17:0-17:0)            | 749.5   | 269.2  | 300 | 45 | 4 | Negative |

|                     |        |        |     |    |   |          |
|---------------------|--------|--------|-----|----|---|----------|
| PG 34:1 (16:0-18:1) | 766.5  | 577.5  | 135 | 15 | 5 | Positive |
| PG 34:1 (16:0-18:1) | 747.51 | 255.2  | 300 | 45 | 4 | Negative |
| PG 34:2 (16:0-18:2) | 764.5  | 575.5  | 135 | 15 | 5 | Positive |
| PG 34:2 (16:0-18:2) | 745.5  | 255.2  | 300 | 45 | 4 | Negative |
| PG 34:2 (16:1-18:1) | 764.5  | 575.5  | 135 | 15 | 5 | Positive |
| PG 34:2 (16:1-18:1) | 745.5  | 281.2  | 300 | 45 | 4 | Negative |
| PG 34:3 (16:1-18:2) | 762.5  | 573.4  | 135 | 15 | 5 | Positive |
| PG 34:3 (16:1-18:2) | 743.48 | 253.2  | 300 | 45 | 4 | Negative |
| PG 36:0 (18:0-18:0) | 796.6  | 607.5  | 135 | 15 | 5 | Positive |
| PG 36:0 (18:0-18:0) | 777.5  | 283.2  | 300 | 45 | 4 | Negative |
| PG 36:1(18:0-18:1)  | 794.5  | 605.5  | 135 | 15 | 5 | Positive |
| PG 36:1(18:0-18:1)  | 775.5  | 281.2  | 300 | 45 | 4 | Negative |
| PG 36:2 (18:1-18:1) | 792.5  | 603.5  | 135 | 15 | 5 | Positive |
| PG 36:2 (18:1-18:1) | 773.5  | 281.28 | 300 | 45 | 4 | Negative |
| PG 36:3 (18:1-18:2) | 790.5  | 601.5  | 135 | 15 | 5 | Positive |
| PG 36:3 (18:1-18:2) | 771.5  | 281.28 | 300 | 45 | 4 | Negative |
| PG 36:4 (16:0-20:4) | 788.5  | 599.5  | 135 | 15 | 5 | Positive |
| PG 36:4 (16:0-20:4) | 769.5  | 255.23 | 300 | 45 | 4 | Negative |
| PG 36:4 (18:2-18:2) | 788.5  | 599.5  | 135 | 15 | 5 | Positive |
| PG 36:4 (18:2-18:2) | 769.5  | 279.23 | 300 | 45 | 4 | Negative |
| PG 38:4 (18:0-20:4) | 816.5  | 627.5  | 135 | 15 | 5 | Positive |
| PG 38:4 (18:0-20:4) | 797.5  | 283.2  | 300 | 45 | 4 | Negative |
| PG 38:5 (18:1-20:4) | 814.5  | 625.5  | 135 | 15 | 5 | Positive |
| PG 38:5 (18:1-20:4) | 795.5  | 281.2  | 300 | 45 | 4 | Negative |
| PG 38:6 (16:0-22:6) | 812.5  | 623.5  | 135 | 15 | 5 | Positive |
| PG 38:6 (16:0-22:6) | 793.5  | 255.23 | 300 | 45 | 4 | Negative |
